# Supplementary material for: Paired Primary and Recurrent Rhabdoid Meningiomas: Cytogenetic Alterations, BAP1 Gene Expression Profile and Patient Outcome
Source: MDPI journal article supplement (doi:10.3390/biology13050350), 2024-05-16

**Table S1.** Clinical features of RM patients.

| ID sample              | Year of diagnosis | Sex    | Age | WHO grade | N. of recurrences | Type of surgery | RDT | Alive status | Follow up (years) |
|------------------------|-------------------|--------|-----|-----------|-------------------|-----------------|-----|--------------|-------------------|
| P1_p                   | 1998              | Male   | 51  | 2         | 1                 | STR             | No  | Alive        | 22                |
| P1_R1                  | 2006              |        | 59  | 3         |                   | GTR             | No  |              |                   |
| P2_p                   | 2010              | Male   | 68  | 3         | 1                 | GTR             | Yes | Alive        | 13                |
| P2_R1                  | 2017              |        | 75  | 3         |                   | GTR             | Yes |              |                   |
| P3_p                   | 2016              | Male   | 58  | 2         | 2                 | GTR             | Yes | Alive        | 7                 |
| P3_R1                  | 2021              |        | 63  | 3         |                   | GTR             | Yes |              |                   |
| P3_R2 <sup>&amp;</sup> | 2023              |        | 65  | -         |                   | No              | No  |              |                   |
| P4_p                   | 1997              | Female | 45  | 1         | 2                 | GTR             | No  | Alive        | 13                |
| P4_R1                  | 2000              |        | 48  | 3         |                   | GTR             | Yes | Alive        |                   |
| P4_R2                  | 2010              |        | 58  | 3         |                   | GTR             | No  | Dead         |                   |
| P5_p                   | 2007              | Male   | 65  | 2         | 3                 | GTR             | No  | Alive        | 16                |
| P5_R1                  | 2011              |        | 69  | 3         |                   | GTR             | No  | Alive        |                   |
| P5_R2                  | 2014*             |        | 72  | 3         |                   | STR             | Yes | Alive        |                   |
| P5_R3                  | 2020              |        | 78  | 3         |                   | STR             | Yes | Alive        |                   |
| P6_p <sup>Θ</sup>      | 1998              | Female | 61  | 2         | 3                 | GTR             | No  | Alive        | 15                |
| P6_R1                  | 2007              |        | 70  | 3         |                   | GTR             | No  | Alive        |                   |
| P6_R2                  | 2009              |        | 72  | 3         |                   | STR             | Yes | Alive        |                   |
| P6_R3                  | 2010              |        | 73  | 3         |                   | RadioS          | Yes | Dead         |                   |
| P7_p                   | 2007              | Female | 69  | 1         | 3                 | GTR             | No  | Alive        | 11                |
| P7_R1                  | 2009              |        | 71  | 2         |                   | GTR             | No  | Alive        |                   |
| P7_R2                  | 2012              |        | 74  | 2         |                   | GTR             | Yes | Alive        |                   |
| P7_R3                  | 2015**            |        | 79  | 3         |                   | STR             | Yes | Dead         |                   |
| P8                     | 2011              | Male   | 34  | 3         | 0                 | GTR             | Yes | Alive        | 11                |
| P9                     | 2011              | Male   | 65  | 3         | 0                 | GTR             | No  | Alive        | 11                |
| P10                    | 2011              | Male   | 65  | 3         | 0                 | GTR             | No  | Dead***      | -                 |
| P11                    | 2018              | Female | 50  | 3         | 0                 | GTR             | No  | Alive        | 6                 |
| P12                    | 2017              | Male   | 54  | 3         | 0                 | GTR             | Yes | Dead         | 3                 |
| P13                    | 2018              | Male   | 53  | 3         | 0                 | STR             | Yes | Alive        | 6                 |
| P14                    | 2019              | Male   | 81  | 3         | 0                 | GTR             | Yes | Alive        | 4                 |
| P15                    | 2001              | Female | 72  | 3         | 0                 | GTR             | No  | Loss         | -                 |

p: primary tumor sample; R: recurrence samples label as 1 for first relapse, 2 for the second one and R3 for the third recurrence; &: second relapse detected recently via magnetic resonance imaging (MRI); Θ: primary calcified tumor excluded by low quality; \*: a second recurrence was detected three years after the first relapse and the P5 received RDT and delayed surgical resection for another four years; \*\*: a third recurrence was detected in 2015 and its surgical resection was done in 2017; \*\*\*: perioperative death; STR: subtotal resection; GTR: gross total resection; RadioS: radiosurgery

**Table S2.** Different genetic changes observed in paired primary and recurrent tumors.

| Group of alteration       | Type of change              | Involved chromosomes |                                                                                                                                           | Patient (recurrent specimen)                     |
|---------------------------|-----------------------------|----------------------|-------------------------------------------------------------------------------------------------------------------------------------------|--------------------------------------------------|
|                           |                             | Previous chr         | New chr                                                                                                                                   |                                                  |
| Same chr                  | Increased size              | del2q                | gain2q                                                                                                                                    | P4 (R1)                                          |
|                           |                             | -10q                 | -10                                                                                                                                       | P5 (R3)                                          |
|                           |                             | del10p               | gain10p                                                                                                                                   | P4 (R2)                                          |
|                           |                             | del19p               | gain19p                                                                                                                                   | P4 (R2)                                          |
|                           |                             | del22q               | -22 <sup>&amp;</sup> / gain22q <sup>\$</sup>                                                                                              | P3 <sup>&amp;</sup> (R1) / P4 <sup>\$</sup> (R2) |
|                           | Decreased size              | -X                   | gainXq                                                                                                                                    | P6 (R2)                                          |
|                           |                             | -8                   | -8p                                                                                                                                       | P5 (R1)                                          |
|                           |                             | -11                  | LOH11                                                                                                                                     | P6 (R2)                                          |
|                           |                             | -19p                 | del19p                                                                                                                                    | P5 (R1)                                          |
|                           | Disappear & appear          | -10, -11, -X         | -10, -11, -X                                                                                                                              | P6 (R2 to R3)                                    |
| Different chromosomal arm | Gain                        | del1p                | +1q                                                                                                                                       | P4 (R1) / P6 (R2)                                |
|                           |                             | -2p                  | gain2q                                                                                                                                    | P4 (R1) / P6 (R2&R3)                             |
|                           |                             | del6q                | gain6p                                                                                                                                    | P4 (R1)                                          |
|                           |                             | del10p               | gain10q                                                                                                                                   | P4 (R2)                                          |
|                           |                             | del19p               | gain19pq                                                                                                                                  | P4 (R1)                                          |
|                           | Loss                        | del22q               | gain22q                                                                                                                                   | P4 (R2)                                          |
|                           |                             | 2q                   | -2p                                                                                                                                       | P4 (R2)                                          |
|                           |                             | del10q               | del10p                                                                                                                                    | P4 (R1)                                          |
|                           | Gain                        |                      | gain6p <sup>\$</sup> , +8 <sup>\$</sup> , gain10p <sup>\$</sup>                                                                           | P4 <sup>\$</sup> (R1&R2)                         |
|                           | (small gain or trisomy)     | -                    | +16p <sup>\$</sup> , gain19pq <sup>\$</sup> , +20 <sup>\$</sup><br>+5p <sup>\$\$</sup> , gain7q <sup>\$\$</sup> , gain22q <sup>\$\$</sup> | P4 <sup>\$\$</sup> (R2)                          |
| Different chr             | Loss (deletion or monosomy) |                      | -3p <sup>\$</sup> , -4q <sup>\$</sup> , del11p <sup>\$</sup> ,<br>del11q <sup>\$</sup> , del16q <sup>\$</sup> , -X <sup>\$</sup>          | P4 <sup>\$</sup> (R1&R2)                         |
|                           |                             |                      | -5q <sup>\$\$</sup> , del15q <sup>\$\$</sup> , del16p <sup>\$\$</sup>                                                                     | P4 <sup>\$\$</sup> (R2)                          |
|                           |                             | -                    | del4p*, del4q*, del7pq*,<br>del8*, del9p*, -10q*,<br>del12q*, 20*, 22*                                                                    | P7* (R3)                                         |
|                           |                             |                      | del6q* <sup>&amp;</sup>                                                                                                                   | P3 <sup>&amp;</sup> (R1) / P7* (R3)              |
|                           | LOH                         | -                    | 3q                                                                                                                                        | P4 (R1)                                          |

Chr: chromosome; del: deletion; -: monosomy; P: patient; R1: first recurrent tumor; R2: second recurrent tumor; R3: third recurrent tumor; +: trisomy; LOH: loss of heterozygosity; <sup>&</sup> abnormality presents in R1 of P3; <sup>\$</sup> abnormality presents in R1 and R2 of P4; <sup>\$\$</sup> abnormality presents in R2 of P4; \* abnormality presents in R3 of P7.

Figure S1: Identical copy number alterations found in primary vs. recurrent RM specimens of two patients.

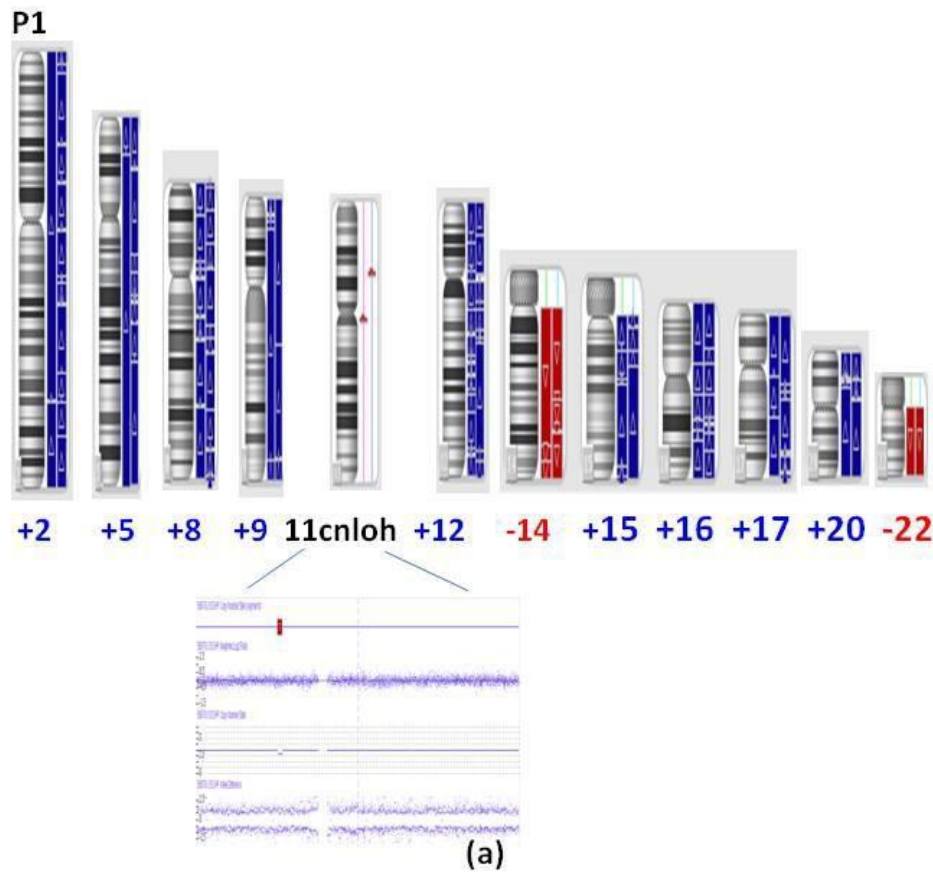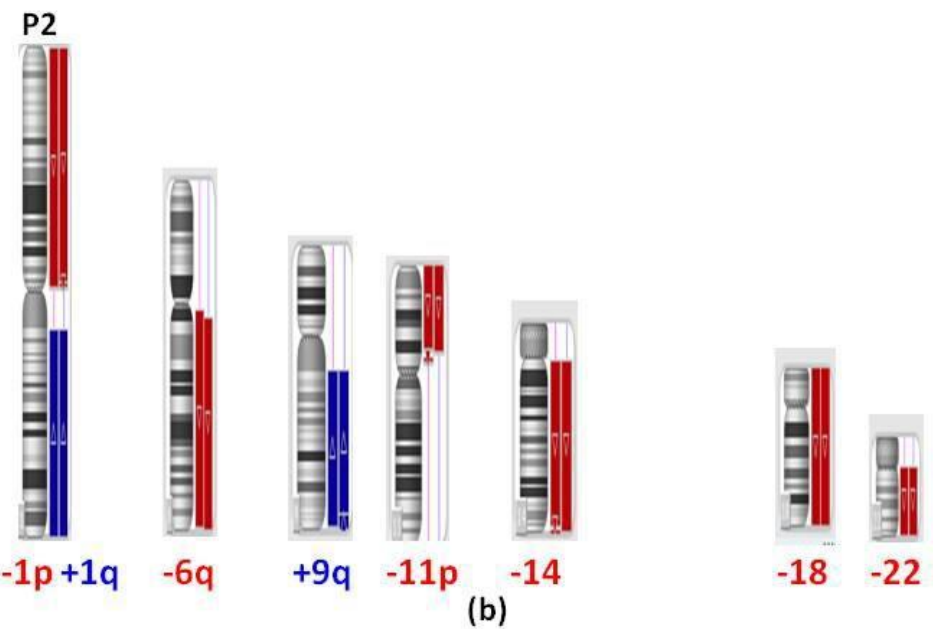

Figure S2: Chromosome losses and gains from diagnostic (primary tumors, P) to tumor recurrent specimens (labeled from the first to the third recurrence as R1, R2 and R3) obtained in 5 patients (a) patient 3 (P3), (b) patient 5 (P5), (c) patient 6 (P6), (d) patient 7 (P7) and (e) patient 4 (P4). Please note that all cases had additional genetic changes in follow-up vs. diagnostic samples. Genetic losses are highlighted in green while gains are highlighted in red. Green lines show small-size losses in the same chromosome, black lines show losses of larger regions, while red lines show new gains in the same chromosome and blue lines indicate the absence of a previous genetic abnormality and its emergence in a subsequent (third) recurrent tumor involving chromosomes 1, 11 and X. Genetic abnormalities surrounded by a blue oval line/box indicate alterations shared in 2 relapses

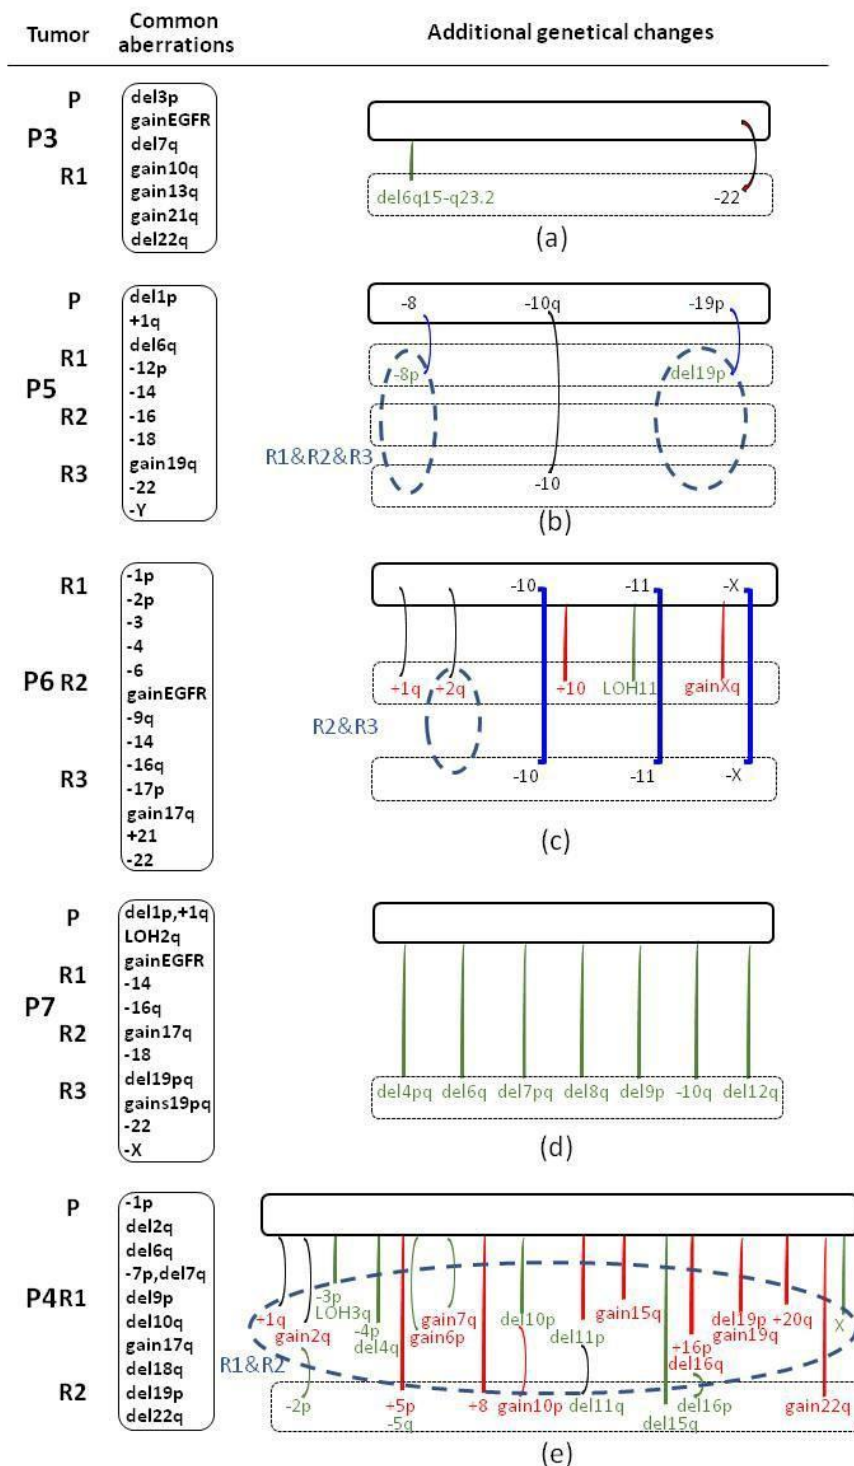

Supplement: s1 [file s1]
